# Supplementary material
Source: PubMed Central journal article supplement (PMC1475436)

**Supplemental Figure 2.** Hierarchical clustering of 3,293 transcripts across eight ROS experiments.

Transcripts showing a minimum 5-fold difference in expression in at least one experiment were hierarchically clustered in two dimensions: transcripts and experiments. Time course experiments are represented by one individual time point. Red and green correspond to upregulation or downregulation, respectively. Gray indicates missing expression values for transcripts that are not represented on either the ATH1 Affymetrix or Agilent Arabidopsis2 array. Three main experiment clusters (I, II and III) are indicated.

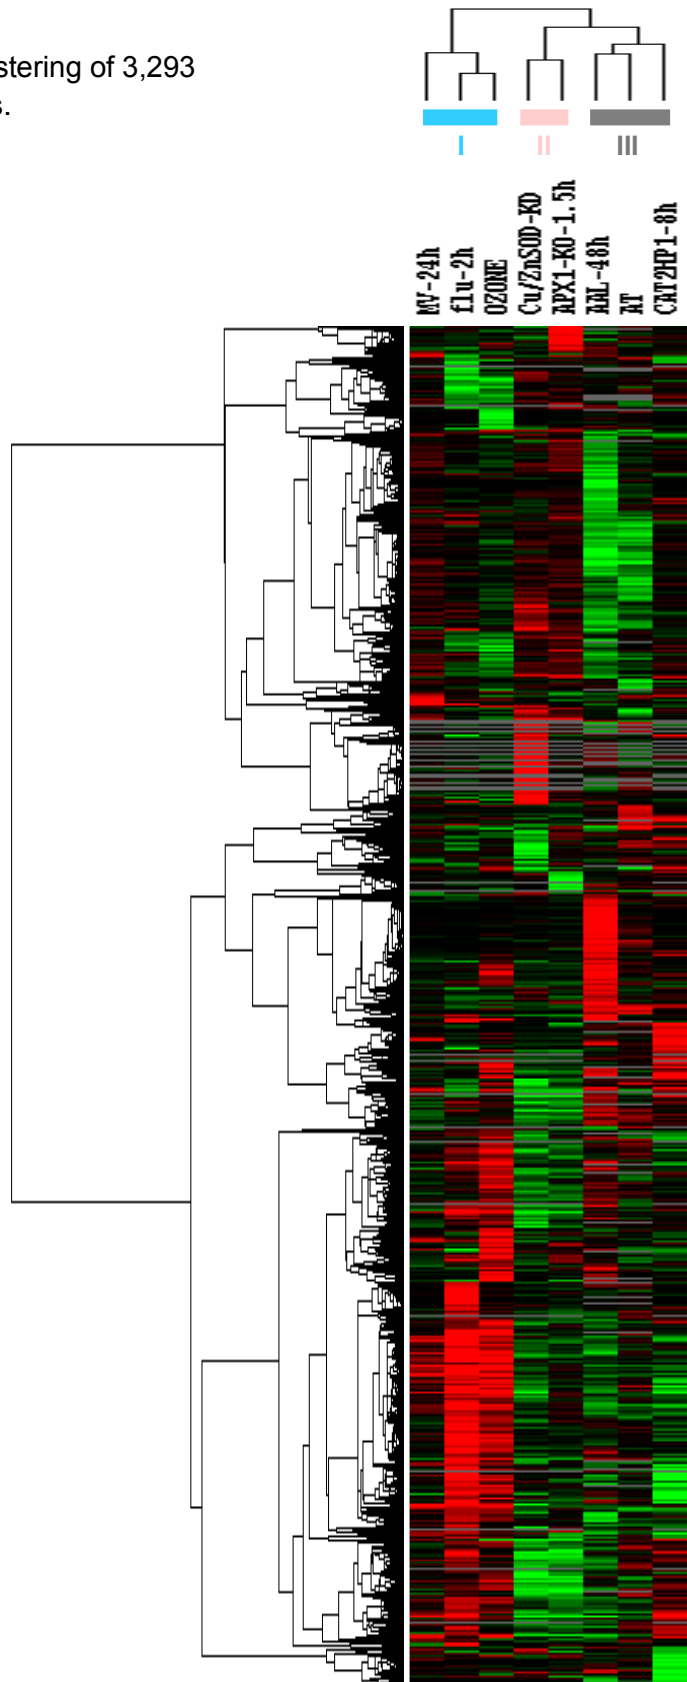

Supplement: plntphys_pp.106.078717_2.pdf [file plntphys_pp.106.078717_2.pdf]
